# Supplementary material for: The effect of long-range interactions on the infrared and Raman spectra of aragonite (CaCO3, Pmcn) up to 25 GPa
Source: Springer Nature journal article supplement (doi:10.1038/s41598-023-29783-7), 2023-02-15
Supplement: MOESM1 [file 41598_2023_29783_MOESM1_ESM.pdf]

# The effect of long-range interactions on the infrared and Raman spectra of aragonite ( $\text{CaCO}_3$ , $Pm\bar{c}n$ ) up to 25 GPa

Gianfranco Ulian<sup>1</sup>, Giovanni Valdrè<sup>1,\*</sup>

<sup>1</sup> Dipartimento di Scienze Biologiche, Geologiche e Ambientali, Centro di Ricerche

Interdisciplinari di Biomineralogia, Cristallografia e Biomateriali, Università di Bologna “Alma Mater Studiorum” Piazza di Porta San Donato 1, 40126 Bologna, Italy.

## Supplementary Materials

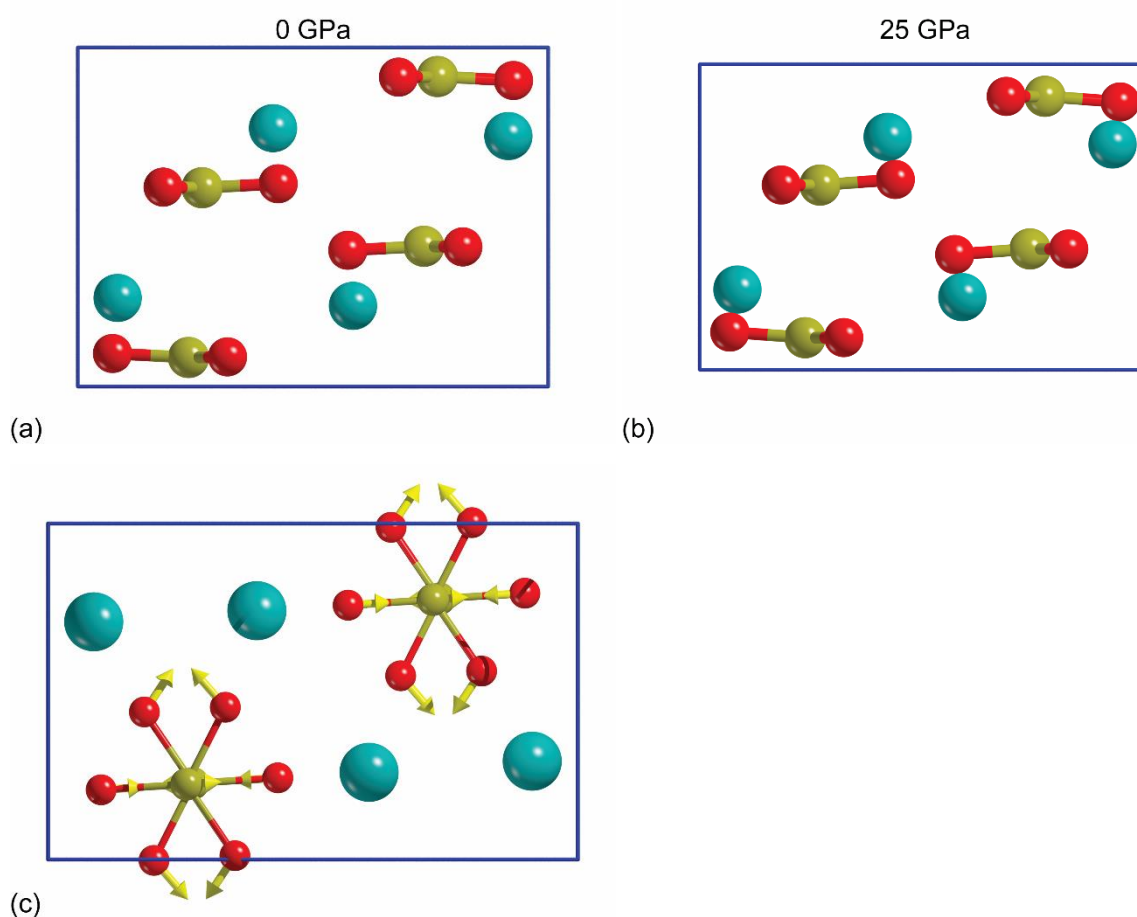

**Figure S1.** Views along the [100] direction of the configurations of aragonite (a) at 0 GPa and (b) at 25 GPa. It is worth noting the movements of the carbonate ions along the [001] direction (i.e., along the  $c$  axis). (c) The  $\nu_4$   $\text{CO}_3^{2-}$  normal mode as viewed from the [001] direction (see text for details).

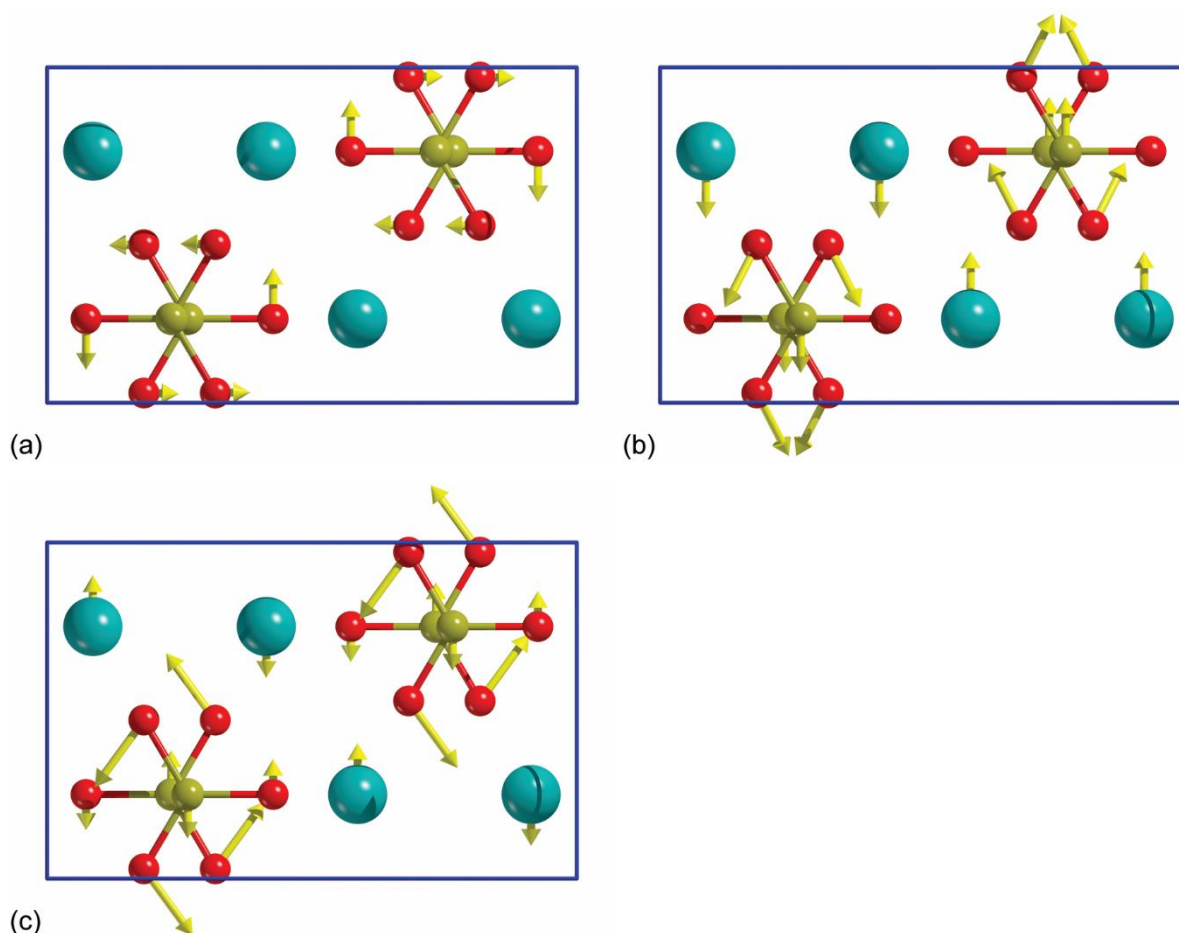

**Figure S2.** Selected normal modes showing very high variation in the mode-Grüneisen's parameters between B3LYP-D\* and B3LYP-D3 methods. (a)  $A_u$  mode (silent), rotation of the carbonate ions around the C atom; (b)  $B_{3g}$  mode (Raman active), rotation of the carbonate ions around one of their O atoms; (c)  $B_{1g}$  mode (Raman active), rotation of the carbonate ions around one of their O atoms. In the three panels, Ca, C and O atoms are coloured in dark cyan, ochre and red, respectively, whereas the unit cell borders are represented with blue lines and the atom displacement vectors are shown as yellow arrows.

**Table S1.** Unit cell parameters (lattice constants and cell volume and mean relevant bond lengths and angles of aragonite as obtained from theoretical and experimental determinations.

|                     | B3LYP <sup>1</sup> | B3LYP-D* <sup>2</sup> | B3LYP-D3 <sup>2</sup> | XRD <sup>3</sup> |
|---------------------|--------------------|-----------------------|-----------------------|------------------|
| a (Å)               | 5.008              | 5.0177                | 4.9544                | 4.96183          |
| b (Å)               | 8.029              | 7.9005                | 7.8836                | 7.96914          |
| c (Å)               | 5.861              | 5.7901                | 5.7091                | 5.74285          |
| V (Å <sup>3</sup> ) | 235.666            | 229.535               | 222.987               | 227.081          |
| <C-O> (Å)           | 1.2847             | 1.2829                | 1.2857                | 1.289            |
| <O-C-O> (°)         | 119.95             | 119.95                | -                     | 2.5272           |
| <Ca --- O> (Å)      | 2.5402             | 2.5135                | -                     | 119.89           |

**Table S2.** Infrared vibrational modes  $\nu$  ( $\text{cm}^{-1}$ ) and oscillator strengths  $f$  ( $\times 10^3$ , dimensionless) from simulations and from experimental measurements and fittings.

|          |               | $\nu_{\text{calc-D3}^1}$ | $\nu_{\text{calc-D}^*2}$ | $\nu_{\text{calc}^3}$ | $\nu_{\text{exp}^3}$ | $\Delta\nu_{\text{D3}}$ | $\Delta\nu_{\text{D2}}$ | $f_{\text{calc-D3}^1}$ | $f_{\text{calc-D}^*2}$ | $f_{\text{calc}^3}$ | $f_{\text{exp}^3}$ | $\Delta f_{\text{D3}}$ | $\Delta f_{\text{D}^*}$ |
|----------|---------------|--------------------------|--------------------------|-----------------------|----------------------|-------------------------|-------------------------|------------------------|------------------------|---------------------|--------------------|------------------------|-------------------------|
| $B_{1u}$ | L             | 197.0                    | 180.4                    | 174.1                 | 183.1                | 13.9                    | -2.7                    | 52.9                   | 36.9                   | 91.8                | 60.4               | -7.5                   | -23.5                   |
|          | L             | 232.7                    | 213.6                    | 210.1                 | 207.8                | 24.9                    | 5.8                     | 3306.3                 | 3795.6                 | 3920.2              | 4105.6             | -799.4                 | -310.0                  |
|          | L             | 276.7                    | 267.2                    | 269.1                 | 259.2                | 17.5                    | 8.0                     | 116.6                  | 186.1                  | 62.4                | 77.4               | 39.2                   | 108.7                   |
|          | L             | 309.9                    | 291.0                    | 288.9                 | 286.9                | 23.0                    | 4.1                     | 21.7                   | 18.8                   | 35.0                | 43.5               | -21.8                  | -24.7                   |
|          | $\nu_4$       | 726.8                    | 719.3                    | 719.2                 | 718.3                | 8.5                     | 1.0                     | 0.3                    | 0.2                    | 0.1                 | 0.4                | -0.1                   | -0.2                    |
|          | $\nu_2$       | 860.2                    | 862.1                    | 861.9                 | 852.2                | 8.0                     | 9.9                     | 128.7                  | 117.2                  | 113.1               | 116.1              | 12.6                   | 1.1                     |
|          | $\nu_1$       | 1100.9                   | 1091.6                   | 1092.9                | 1082.8               | 18.1                    | 8.8                     | 2.9                    | 2.7                    | 2.4                 | 1.9                | 1.0                    | 0.8                     |
|          | $\nu_3$       | 1491.0                   | 1485.7                   | 1469.9                | -                    | -                       | -                       | 0.1                    | 0.0                    | 0.0                 | -                  | -                      | -                       |
|          | $F[\Delta F]$ |                          |                          |                       |                      |                         |                         | 3629.4                 | 4157.5                 | 4225.0              | 4405.3             | -775.9                 | -247.8                  |
| $B_{2u}$ | L             | 90.0                     | 27.8                     | 65.4                  | 105.4                | -15.4                   | -77.6                   | 4525.4                 | 54048.2                | 6554.9              | 2228.3             | 2297.1                 | 51819.9                 |
|          | L             | 175.9                    | 163.0                    | 158.7                 | 164.2                | 11.7                    | -1.2                    | 1.2                    | 1.0                    | 62.1                | 53.4               | -52.2                  | -52.4                   |
|          | L             | 229.6                    | 202.0                    | 198                   | 219.9                | 9.7                     | -17.9                   | 4635.0                 | 5675.7                 | 5838.5              | 4862.0             | -227.0                 | 813.7                   |
|          | $\nu_4$       | 703.5                    | 697.7                    | 697.4                 | 699.8                | 3.7                     | -2.1                    | 6.7                    | 4.1                    | 5.2                 | 6.7                | 0.0                    | -2.6                    |
|          | $\nu_3$       | 1461.3                   | 1443.4                   | 1445.1                | 1444.5               | 16.8                    | -1.1                    | 479.5                  | 478.7                  | 467.1               | 458.0              | 21.5                   | 20.7                    |
|          | $F[\Delta F]$ |                          |                          |                       |                      |                         |                         | 9647.8                 | 60207.7                | 12927.8             | 7608.4             | 2039.4                 | 52599.3                 |
| $B_{3u}$ | L             | 155.0                    | 152.5                    | 147.3                 | 144.4                | 10.6                    | 8.1                     | 127.9                  | 94.0                   | 16.2                | 59.3               | 68.6                   | 34.7                    |
|          | L             | 221.3                    | 199.0                    | 200.7                 | 208.6                | 12.7                    | -9.6                    | 1911.1                 | 2633.8                 | 2617.5              | 1829.6             | 81.5                   | 804.2                   |
|          | L             | 274.4                    | 248.7                    | 245.5                 | 249.5                | 24.9                    | -0.8                    | 2147.7                 | 2322.5                 | 2286.7              | 2423.0             | -275.3                 | -100.5                  |
|          | L             | 316.5                    | 304.8                    | 293.1                 | 298                  | 18.5                    | 6.8                     | 0.0                    | 0.1                    | 7.0                 | 164.9              | -164.9                 | -164.8                  |
|          | $\nu_4$       | 719.1                    | 711.7                    | 712.2                 | 712.4                | 6.7                     | -0.7                    | 20.7                   | 17.9                   | 15.5                | 16.6               | 4.1                    | 1.3                     |
|          | $\nu_2$       | 917.6                    | 915.2                    | 913.1                 | 908.8                | 8.8                     | 6.4                     | 0.3                    | 0.3                    | 0.1                 | 0.2                | 0.1                    | 0.1                     |
|          | $\nu_1$       | 1101.8                   | 1092.5                   | 1092.9                | 1082.8               | 19.0                    | 9.7                     | 1.8                    | 3.4                    | 1.3                 | 1.1                | 0.7                    | 2.3                     |
|          | $\nu_3$       | 1493.4                   | 1486.7                   | 1474.1                | 1466.6               | 26.8                    | 20.1                    | 481.6                  | 472.9                  | 469.2               | 461.2              | 20.4                   | 11.7                    |
|          | $F[\Delta F]$ |                          |                          |                       |                      |                         |                         | 4691.1                 | 5544.8                 | 5413.5              | 4955.9             | -264.8                 | 588.9                   |

Notes: 1 – present work, B3LYP-D3; 2 – present work, B3LYP-D\*; 3 – B3LYP (calc) and experimental data from the work of Carter et al.<sup>1</sup>.  $\Delta\nu$  and  $\Delta f$  is the difference between the vibrational frequencies and oscillator strengths, respectively, simulated in the present work and the reported experimental ones.  $F = \sum_n f_n$  is the sum of the oscillator strengths, whereas  $\Delta F = \sum_n |\Delta f_n|$  is the sum of the absolute differences between the calculated and the experimental oscillator strengths.

**Table S3.** Silent vibrational modes  $\nu$  ( $A_u$ ,  $\text{cm}^{-1}$ ) obtained from simulations at the DFT/B3LYP level of theory with and without corrections for the long-range interactions.

|       |         | <b>B3LYP-D3<sup>1</sup></b> | <b>B3LYP-D*<sup>1</sup></b> | <b>B3LYP<sup>2</sup></b> | <b>B3LYP<sup>3</sup></b> |
|-------|---------|-----------------------------|-----------------------------|--------------------------|--------------------------|
| $A_u$ | L       | 106.8                       | 49.5                        | 70.8                     | 69                       |
|       | L       | 151.2                       | 138.5                       | 132.6                    | 134                      |
|       | L       | 170.9                       | 150.2                       | 147.6                    | 143                      |
|       | L       | 281.9                       | 273.5                       | 265.4                    | 261                      |
|       | $\nu_4$ | 696.9                       | 691.2                       | 686.8                    | 692                      |
|       | $\nu_3$ | 1404.5                      | 1388.1                      | 1420.1                   | 1393                     |

Notes: 1 – present work, 2 – theoretical study performed by Ungureanu et al.<sup>4</sup>; 3 – DFT simulations of Carteret and co-workers<sup>1</sup>.

**Table S4.** Vibrational modes  $\nu$  (cm<sup>-1</sup>) of aragonite, subdivided in irreducible representations (IRREPs), simulated at the DFT/B3LYP-D3 level of theory between about -3 GPa and 25 GPa.

| IRREP                 | Pressure (GPa)        |        |        |        |        |        |        |        |        |        |        |        |        |        |       |
|-----------------------|-----------------------|--------|--------|--------|--------|--------|--------|--------|--------|--------|--------|--------|--------|--------|-------|
|                       | -3.1                  | -2     | -1     | 0      | 1      | 3.1    | 5.1    | 7.1    | 9.2    | 11.2   | 13.3   | 15.4   | 20.6   | 24.9   |       |
| <i>B<sub>1u</sub></i> | 177.8                 | 184.6  | 190.9  | 197.0  | 202.7  | 213.5  | 224.1  | 233.9  | 243.6  | 252.6  | 261.3  | 269.8  | 289.2  | 302.6  |       |
|                       | 214.0                 | 220.8  | 227.3  | 233.0  | 238.4  | 248.4  | 257.7  | 266.0  | 272.8  | 278.5  | 284.7  | 290.7  | 303.2  | 310.8  |       |
|                       | 269.2                 | 271.6  | 274.0  | 276.5  | 279.1  | 284.5  | 289.9  | 295.5  | 300.8  | 306.0  | 311.2  | 316.6  | 330.4  | 340.8  |       |
|                       | 291.9                 | 298.4  | 304.6  | 310.2  | 315.5  | 325.5  | 335.2  | 344.8  | 354.0  | 362.8  | 371.6  | 380.4  | 401.6  | 417.1  |       |
|                       | 718.7                 | 721.4  | 724.1  | 726.4  | 729.1  | 733.6  | 738.6  | 743.0  | 747.4  | 752.0  | 756.3  | 760.5  | 769.8  | 777.5  |       |
|                       | 862.1                 | 861.6  | 861.0  | 860.4  | 859.9  | 858.7  | 857.7  | 856.5  | 855.2  | 853.5  | 852.0  | 850.7  | 847.7  | 845.2  |       |
|                       | 1091.1                | 1094.3 | 1097.4 | 1100.0 | 1103.3 | 1109.1 | 1114.5 | 1119.7 | 1124.7 | 1129.7 | 1134.4 | 1138.4 | 1148.9 | 1157.4 |       |
|                       | 1475.3                | 1480.5 | 1485.6 | 1490.1 | 1494.8 | 1503.3 | 1510.7 | 1518.5 | 1525.2 | 1531.9 | 1538.0 | 1543.6 | 1555.9 | 1565.6 |       |
|                       | <i>B<sub>2u</sub></i> | 62.8   | 73.7   | 82.7   | 90.2   | 96.6   | 107.9  | 116.9  | 124.4  | 130.8  | 137.0  | 142.0  | 146.5  | 154.9  | 160.1 |
|                       |                       | 160.1  | 165.6  | 171.0  | 176.1  | 181.2  | 191.6  | 201.8  | 211.6  | 221.0  | 229.6  | 238.3  | 246.6  | 265.1  | 279.3 |
| 201.9                 |                       | 211.7  | 221.0  | 229.7  | 237.7  | 253.1  | 267.3  | 280.4  | 292.3  | 303.4  | 313.8  | 323.5  | 344.3  | 360.3  |       |
| 698.2                 |                       | 700.0  | 701.7  | 703.5  | 705.2  | 708.4  | 711.7  | 714.9  | 718.0  | 721.1  | 724.1  | 727.2  | 734.4  | 739.7  |       |
| 1445.4                |                       | 1450.8 | 1455.9 | 1461.0 | 1465.9 | 1475.3 | 1484.1 | 1492.6 | 1501.1 | 1509.1 | 1517.0 | 1524.6 | 1541.9 | 1557.2 |       |
| <i>B<sub>3u</sub></i> |                       | 149.7  | 151.6  | 153.5  | 155.1  | 156.5  | 159.4  | 162.3  | 165.3  | 167.8  | 170.1  | 172.3  | 174.5  | 178.3  | 179.8 |
|                       |                       | 202.3  | 209.3  | 215.5  | 221.2  | 226.5  | 236.3  | 246.1  | 255.4  | 263.6  | 270.9  | 278.2  | 285.7  | 301.5  | 310.3 |
|                       |                       | 250.3  | 258.7  | 267.0  | 274.6  | 281.6  | 294.9  | 307.7  | 319.6  | 330.7  | 341.3  | 351.7  | 361.9  | 386.9  | 404.5 |
|                       |                       | 297.0  | 303.6  | 310.0  | 316.3  | 322.4  | 334.7  | 346.3  | 357.4  | 367.9  | 378.0  | 387.7  | 397.3  | 419.1  | 435.9 |
|                       |                       | 711.4  | 714.0  | 716.5  | 719.0  | 721.3  | 725.9  | 730.5  | 735.1  | 739.6  | 744.0  | 748.4  | 752.6  | 762.4  | 770.3 |
|                       | 914.7                 | 915.8  | 916.6  | 917.6  | 918.6  | 920.6  | 922.6  | 924.4  | 926.1  | 927.5  | 929.1  | 930.6  | 934.3  | 938.0  |       |
|                       | 1091.4                | 1094.8 | 1098.3 | 1101.3 | 1104.8 | 1111.0 | 1116.6 | 1122.5 | 1128.2 | 1133.7 | 1139.1 | 1144.1 | 1156.1 | 1165.6 |       |
|                       | 1478.9                | 1483.6 | 1488.2 | 1492.7 | 1496.9 | 1504.6 | 1511.5 | 1518.6 | 1525.2 | 1531.6 | 1537.8 | 1543.6 | 1557.6 | 1568.0 |       |
|                       | <i>A<sub>g</sub></i>  | 149.8  | 150.4  | 150.4  | 150.5  | 150.2  | 149.6  | 148.5  | 148.0  | 146.3  | 143.3  | 141.4  | 133.2  | 107.5  | 82.6  |
|                       |                       | 162.8  | 167.4  | 171.4  | 175.1  | 178.3  | 184.6  | 189.4  | 193.1  | 195.6  | 196.2  | 198.1  | 196.1  | 191.5  | 199.7 |
| 199.4                 |                       | 204.0  | 207.4  | 210.1  | 212.6  | 216.6  | 220.8  | 225.7  | 230.2  | 235.2  | 239.6  | 248.1  | 261.4  | 281.9  |       |
| 208.9                 |                       | 215.6  | 222.3  | 228.7  | 235.0  | 246.5  | 257.6  | 268.7  | 279.1  | 289.0  | 298.0  | 307.7  | 330.3  | 337.6  |       |
| 283.8                 |                       | 291.3  | 299.1  | 306.4  | 313.2  | 326.9  | 340.1  | 352.1  | 363.5  | 373.2  | 383.0  | 394.6  | 420.6  | 445.1  |       |
| 703.6                 |                       | 706.0  | 708.1  | 710.6  | 713.0  | 717.2  | 721.7  | 726.2  | 730.8  | 735.1  | 739.8  | 747.3  | 767.6  | 760.5  |       |
| 863.0                 |                       | 862.4  | 861.8  | 861.3  | 860.8  | 859.6  | 858.5  | 857.3  | 856.0  | 853.1  | 853.3  | 853.1  | 849.6  | 847.3  |       |
| 1093.7                |                       | 1097.1 | 1100.4 | 1104.1 | 1107.0 | 1113.2 | 1118.9 | 1125.0 | 1130.7 | 1137.0 | 1141.3 | 1153.3 | 1178.5 | 1189.3 |       |
| 1478.2                |                       | 1482.2 | 1486.1 | 1489.7 | 1493.4 | 1499.7 | 1505.4 | 1511.5 | 1517.0 | 1522.0 | 1527.1 | 1533.8 | 1546.8 | 1554.4 |       |
| <i>B<sub>1g</sub></i> |                       | 105.4  | 113.0  | 119.7  | 125.2  | 129.9  | 138.1  | 144.9  | 150.5  | 155.1  | 158.9  | 162.3  | 165.3  | 171.6  | 172.4 |
|                       | 170.9                 | 177.2  | 182.0  | 186.2  | 190.2  | 197.8  | 205.3  | 212.3  | 218.6  | 224.7  | 230.4  | 235.7  | 247.5  | 256.1  |       |
|                       | 179.5                 | 185.1  | 191.6  | 198.2  | 204.6  | 216.9  | 228.6  | 239.6  | 249.7  | 259.3  | 268.4  | 277.1  | 296.2  | 309.1  |       |
|                       | 275.2                 | 281.5  | 287.8  | 293.8  | 299.6  | 311.2  | 322.2  | 332.6  | 342.0  | 351.0  | 359.4  | 367.3  | 384.6  | 396.9  |       |
|                       | 702.2                 | 704.0  | 705.8  | 707.6  | 709.3  | 712.7  | 716.1  | 719.5  | 722.7  | 726.0  | 729.1  | 732.2  | 739.0  | 744.4  |       |
|                       | 1414.0                | 1418.4 | 1422.5 | 1426.7 | 1430.7 | 1438.4 | 1445.7 | 1452.7 | 1459.6 | 1466.4 | 1472.9 | 1478.9 | 1495.3 | 1505.4 |       |
|                       | <i>B<sub>2g</sub></i> | 186.5  | 191.5  | 195.6  | 198.8  | 201.4  | 205.4  | 209.4  | 212.8  | 215.9  | 218.8  | 222.0  | 225.6  | 236.8  | 247.2 |
|                       |                       | 209.2  | 213.2  | 217.3  | 221.4  | 225.8  | 234.9  | 244.5  | 254.3  | 263.4  | 272.3  | 280.6  | 289.2  | 307.4  | 318.1 |
|                       |                       | 251.1  | 256.1  | 260.8  | 265.1  | 268.8  | 275.7  | 281.5  | 287.1  | 292.1  | 296.8  | 302.0  | 307.0  | 319.0  | 328.1 |
|                       |                       | 265.3  | 272.2  | 278.4  | 283.7  | 288.5  | 296.7  | 304.5  | 311.8  | 318.4  | 324.2  | 330.1  | 336.0  | 349.3  | 358.3 |
| 283.0                 |                       | 288.5  | 294.3  | 300.7  | 307.2  | 321.5  | 335.0  | 348.6  | 361.2  | 373.4  | 385.0  | 396.1  | 421.7  | 440.7  |       |
| 714.4                 |                       | 717.5  | 720.5  | 723.3  | 726.1  | 731.5  | 737.0  | 742.2  | 747.5  | 752.5  | 757.5  | 762.3  | 773.8  | 782.4  |       |
| 913.5                 |                       | 914.5  | 915.3  | 916.3  | 917.4  | 919.1  | 921.1  | 922.8  | 924.4  | 925.8  | 927.3  | 928.7  | 932.2  | 935.5  |       |
| 1090.0                |                       | 1093.2 | 1096.3 | 1099.3 | 1102.4 | 1108.0 | 1113.1 | 1118.3 | 1123.3 | 1128.1 | 1132.7 | 1136.9 | 1145.9 | 1154.7 |       |
| 1596.4                |                       | 1601.4 | 1606.2 | 1611.1 | 1615.3 | 1623.5 | 1630.7 | 1638.5 | 1645.4 | 1652.4 | 1659.0 | 1665.3 | 1680.7 | 1692.3 |       |
| <i>B<sub>3g</sub></i> |                       | 101.1  | 107.8  | 113.3  | 117.8  | 121.7  | 128.3  | 134.0  | 139.3  | 144.0  | 148.4  | 152.3  | 156.0  | 165.6  | 168.5 |
|                       | 151.9                 | 155.3  | 158.8  | 161.9  | 165.3  | 171.8  | 178.0  | 184.0  | 189.4  | 194.4  | 199.2  | 203.5  | 211.6  | 217.1  |       |
|                       | 204.3                 | 212.7  | 220.6  | 227.9  | 234.7  | 247.7  | 260.0  | 271.5  | 281.9  | 291.7  | 301.0  | 309.6  | 325.7  | 340.0  |       |
|                       | 217.3                 | 224.2  | 230.9  | 237.5  | 243.9  | 256.9  | 269.1  | 280.5  | 290.9  | 300.8  | 310.2  | 319.2  | 340.5  | 356.7  |       |
|                       | 706.6                 | 708.6  | 710.5  | 712.4  | 714.2  | 717.7  | 721.1  | 724.4  | 727.5  | 730.4  | 733.3  | 736.1  | 742.3  | 746.5  |       |
|                       | 1463.8                | 1468.8 | 1473.4 | 1478.2 | 1482.7 | 1491.5 | 1499.7 | 1507.6 | 1515.8 | 1523.0 | 1530.3 | 1537.2 | 1552.9 | 1567.6 |       |
|                       | <i>A<sub>u</sub></i>  | 71.7   | 85.8   | 97.1   | 106.8  | 115.3  | 130.2  | 142.3  | 152.2  | 160.2  | 166.9  | 172.4  | 177.1  | 185.3  | 190.0 |
|                       |                       | 136.3  | 141.5  | 146.6  | 151.2  | 155.4  | 163.5  | 171.1  | 178.7  | 186.1  | 193.8  | 201.3  | 209.0  | 227.5  | 242.9 |
|                       |                       | 148.6  | 156.7  | 164.0  | 170.9  | 177.3  | 189.4  | 201.2  | 212.2  | 222.4  | 232.1  | 241.6  | 250.4  | 269.1  | 283.2 |
|                       |                       | 264.4  | 270.3  | 276.1  | 281.9  | 287.5  | 299.0  | 309.9  | 320.3  | 330.0  | 339.3  | 347.9  | 356.3  | 374.8  | 387.9 |
| 692.6                 |                       | 694.1  | 695.5  | 696.9  | 698.3  | 701.1  | 703.7  | 706.3  | 708.8  | 711.4  | 713.9  | 716.4  | 722.0  | 725.9  |       |
| 1391.7                |                       | 1396.2 | 1400.3 | 1404.5 | 1408.6 | 1416.4 | 1423.7 | 1430.6 | 1437.4 | 1444.5 | 1451.0 | 1457.2 | 1471.1 | 1483.9 |       |

**Table S5.** DFT/B3LYP-D\* vibrational modes  $\nu$  (cm<sup>-1</sup>) of aragonite, subdivided in irreducible representations (IRREPs), between about -3 GPa and 25 GPa. Frequency marked with an asterisk are soft modes.

| IRREP    | Pressure (GPa) |        |        |        |        |        |        |        |        |        |        |        |        |        |
|----------|----------------|--------|--------|--------|--------|--------|--------|--------|--------|--------|--------|--------|--------|--------|
|          | -3.1           | -2.0   | -1.0   | 0.1    | 1.1    | 3.1    | 5.2    | 7.2    | 9.2    | 11.2   | 13.2   | 15.2   | 20.3   | 24.4   |
| $B_{1u}$ | 155.2          | 164.6  | 172.9  | 180.4  | 187.4  | 200.1  | 211.9  | 222.7  | 232.3  | 241.1  | 249.4  | 257.1  | 274.8  | 289.1  |
|          | 187.4          | 197.2  | 205.8  | 213.6  | 220.3  | 232.5  | 244.3  | 254.9  | 264.8  | 273.0  | 280.4  | 287.5  | 304.6  | 308.8  |
|          | 259.2          | 261.8  | 264.4  | 267.2  | 269.7  | 275.2  | 280.9  | 287.0  | 292.8  | 297.8  | 302.9  | 307.1  | 319.6  | 330.0  |
|          | 269.1          | 276.7  | 284.2  | 291.0  | 297.3  | 309.1  | 320.3  | 330.9  | 340.9  | 349.8  | 358.7  | 367.1  | 386.8  | 402.3  |
|          | 710.8          | 713.6  | 716.5  | 719.3  | 721.8  | 726.9  | 731.9  | 736.6  | 741.1  | 745.3  | 750.2  | 754.0  | 764.1  | 772.1  |
|          | 864.2          | 863.5  | 862.9  | 862.1  | 861.8  | 860.3  | 859.3  | 858.2  | 857.2  | 855.7  | 854.0  | 851.7  | 848.8  | 844.5  |
|          | 1081.5         | 1085.1 | 1088.3 | 1091.6 | 1094.1 | 1100.6 | 1106.4 | 1111.9 | 1117.3 | 1122.2 | 1127.6 | 1131.6 | 1142.4 | 1150.5 |
|          | 1467.4         | 1473.9 | 1479.9 | 1485.7 | 1491.0 | 1500.9 | 1510.3 | 1518.6 | 1526.7 | 1533.6 | 1540.3 | 1546.1 | 1560.7 | 1569.1 |
| $B_{2u}$ | -56.3*         | -40.9* | -18.4* | 27.8   | 44.0   | 63.2   | 75.6   | 87.1   | 96.2   | 104.0  | 111.5  | 117.7  | 130.2  | 140.9  |
|          | 145.7          | 151.9  | 157.3  | 163.0  | 168.5  | 179.2  | 190.0  | 200.4  | 210.2  | 218.8  | 227.5  | 235.6  | 254.8  | 267.1  |
|          | 167.4          | 180.0  | 191.5  | 202.0  | 212.1  | 230.1  | 246.8  | 261.7  | 275.5  | 288.2  | 300.1  | 310.6  | 335.6  | 350.9  |
|          | 692.0          | 694.0  | 695.9  | 697.7  | 699.5  | 703.0  | 706.3  | 709.6  | 712.8  | 715.8  | 718.7  | 721.5  | 728.6  | 734.4  |
| $B_{3u}$ | 1426.8         | 1432.5 | 1438.3 | 1443.4 | 1448.6 | 1458.2 | 1467.1 | 1476.4 | 1485.1 | 1493.1 | 1501.0 | 1509.0 | 1527.2 | 1542.5 |
|          | 143.6          | 147.4  | 150.2  | 152.5  | 154.5  | 157.8  | 161.4  | 164.7  | 167.8  | 170.1  | 172.7  | 174.4  | 180.5  | 182.9  |
|          | 173.4          | 182.5  | 191.2  | 199.0  | 205.7  | 217.9  | 229.9  | 241.4  | 251.9  | 260.8  | 269.0  | 276.8  | 295.6  | 304.9  |
|          | 219.7          | 230.1  | 239.6  | 248.7  | 257.0  | 272.5  | 287.0  | 300.2  | 312.6  | 323.4  | 333.9  | 343.5  | 366.7  | 385.1  |
|          | 283.8          | 290.8  | 297.9  | 304.8  | 311.4  | 324.6  | 337.5  | 349.5  | 360.8  | 371.4  | 381.5  | 391.1  | 413.0  | 428.2  |
|          | 703.5          | 706.3  | 709.1  | 711.7  | 714.2  | 719.1  | 723.9  | 728.6  | 733.2  | 737.6  | 742.0  | 746.2  | 756.7  | 764.6  |
|          | 911.7          | 912.8  | 914.3  | 915.2  | 916.7  | 918.5  | 920.8  | 922.8  | 924.8  | 926.4  | 927.4  | 928.5  | 931.0  | 932.5  |
|          | 1081.7         | 1085.3 | 1089.0 | 1092.5 | 1095.6 | 1102.4 | 1108.8 | 1115.0 | 1120.8 | 1126.3 | 1131.7 | 1136.6 | 1148.8 | 1158.1 |
| $A_g$    | 1470.8         | 1476.4 | 1481.6 | 1486.7 | 1491.3 | 1500.1 | 1508.3 | 1515.9 | 1523.0 | 1529.4 | 1535.5 | 1541.0 | 1554.8 | 1564.6 |
|          | 139.6          | 144.0  | 146.2  | 146.9  | 147.0  | 146.7  | 146.5  | 146.4  | 145.8  | 144.6  | 142.6  | 140.8  | 138.6  | 130.3  |
|          | 154.9          | 156.3  | 160.3  | 164.9  | 168.3  | 175.4  | 180.5  | 184.0  | 186.9  | 189.0  | 190.8  | 193.4  | 194.0  | 195.4  |
|          | 174.1          | 183.8  | 191.5  | 197.7  | 202.1  | 210.3  | 218.1  | 224.9  | 231.6  | 237.1  | 241.2  | 245.3  | 258.5  | 263.9  |
|          | 186.0          | 193.5  | 200.5  | 207.6  | 214.2  | 227.8  | 240.5  | 252.8  | 264.3  | 274.7  | 284.3  | 292.5  | 318.2  | 327.4  |
|          | 261.3          | 269.8  | 278.2  | 285.9  | 293.6  | 308.1  | 322.7  | 336.3  | 349.1  | 360.5  | 372.1  | 382.0  | 405.5  | 423.2  |
|          | 696.0          | 698.8  | 701.4  | 703.8  | 706.1  | 710.6  | 715.4  | 720.1  | 724.3  | 728.7  | 729.5  | 737.6  | 745.8  | 762.1  |
|          | 865.2          | 864.5  | 863.9  | 863.1  | 862.8  | 861.4  | 860.5  | 859.3  | 858.3  | 856.9  | 855.2  | 849.3  | 850.1  | 844.7  |
|          | 1084.1         | 1087.8 | 1091.6 | 1095.1 | 1098.9 | 1105.2 | 1111.9 | 1117.6 | 1123.4 | 1128.9 | 1133.1 | 1140.8 | 1151.5 | 1156.1 |
|          | 1472.2         | 1477.0 | 1481.5 | 1485.9 | 1489.9 | 1497.6 | 1504.8 | 1511.4 | 1517.6 | 1523.0 | 1528.8 | 1532.8 | 1546.8 | 1552.8 |
| $B_{1g}$ | 70.9           | 85.4   | 96.1   | 104.3  | 111.4  | 122.9  | 132.2  | 139.6  | 146.4  | 151.7  | 156.1  | 161.0  | 170.4  | 174.2  |
|          | 136.1          | 146.6  | 155.9  | 163.9  | 171.2  | 183.1  | 191.6  | 198.9  | 205.3  | 211.3  | 217.1  | 222.2  | 234.1  | 243.1  |
|          | 172.9          | 176.3  | 179.8  | 184.1  | 188.6  | 199.1  | 211.2  | 223.3  | 235.0  | 245.8  | 255.9  | 265.9  | 288.2  | 302.4  |
|          | 262.5          | 270.2  | 277.6  | 284.9  | 291.7  | 305.0  | 317.8  | 329.4  | 340.4  | 350.1  | 359.5  | 367.9  | 387.2  | 399.2  |
|          | 697.0          | 699.2  | 701.1  | 703.1  | 705.0  | 708.7  | 712.3  | 715.9  | 719.4  | 722.6  | 725.8  | 728.9  | 736.6  | 741.9  |
|          | 1397.3         | 1402.1 | 1406.6 | 1410.4 | 1414.3 | 1422.6 | 1429.9 | 1437.6 | 1444.2 | 1451.4 | 1458.5 | 1464.6 | 1479.6 | 1492.7 |
| $B_{2g}$ | 163.4          | 172.4  | 179.6  | 185.7  | 190.3  | 197.6  | 204.0  | 209.3  | 214.0  | 217.2  | 219.6  | 221.3  | 225.8  | 229.8  |
|          | 199.0          | 203.7  | 208.5  | 213.7  | 218.9  | 229.5  | 240.9  | 251.3  | 261.2  | 269.4  | 277.8  | 285.4  | 302.9  | 310.8  |
|          | 234.1          | 240.8  | 246.8  | 252.4  | 257.2  | 265.7  | 273.0  | 279.0  | 284.5  | 289.3  | 293.6  | 298.2  | 310.7  | 321.8  |
|          | 245.5          | 252.5  | 258.9  | 264.9  | 270.3  | 280.2  | 289.5  | 298.4  | 306.9  | 314.0  | 321.1  | 327.6  | 344.0  | 354.2  |
|          | 267.7          | 273.9  | 280.3  | 286.7  | 293.2  | 306.9  | 320.7  | 334.3  | 347.6  | 360.5  | 372.5  | 384.1  | 410.2  | 429.0  |
|          | 705.4          | 709.0  | 712.3  | 715.5  | 718.5  | 724.2  | 730.0  | 735.4  | 740.7  | 745.8  | 751.0  | 755.8  | 767.7  | 776.8  |
|          | 910.8          | 911.8  | 913.0  | 913.9  | 915.1  | 917.0  | 919.2  | 921.1  | 923.0  | 924.5  | 925.6  | 926.7  | 929.1  | 930.5  |
|          | 1081.2         | 1084.5 | 1087.9 | 1091.1 | 1093.8 | 1100.0 | 1105.7 | 1111.2 | 1116.3 | 1121.3 | 1126.2 | 1130.3 | 1140.9 | 1148.6 |
| $B_{3g}$ | 1586.8         | 1592.6 | 1598.2 | 1603.4 | 1608.3 | 1617.4 | 1625.9 | 1633.6 | 1641.0 | 1647.7 | 1654.1 | 1660.1 | 1674.8 | 1686.1 |
|          | 62.6           | 75.8   | 85.9   | 93.8   | 100.1  | 110.0  | 118.3  | 125.5  | 132.1  | 138.1  | 143.5  | 149.2  | 160.1  | 166.8  |
|          | 143.6          | 147.9  | 151.3  | 155.1  | 158.5  | 165.2  | 171.6  | 177.7  | 183.4  | 187.9  | 192.4  | 196.6  | 205.9  | 212.7  |
|          | 173.5          | 184.0  | 193.6  | 202.8  | 211.5  | 227.6  | 242.5  | 256.1  | 268.3  | 279.3  | 289.4  | 298.9  | 319.9  | 333.0  |
|          | 203.4          | 210.4  | 217.6  | 224.2  | 230.9  | 243.7  | 255.8  | 267.4  | 278.5  | 288.6  | 298.3  | 308.1  | 329.5  | 345.4  |
|          | 701.0          | 703.2  | 705.2  | 707.2  | 709.1  | 712.8  | 716.4  | 719.8  | 723.2  | 726.3  | 729.3  | 732.2  | 738.9  | 744.1  |
| $A_u$    | 1446.5         | 1451.7 | 1457.0 | 1461.7 | 1466.5 | 1475.3 | 1483.1 | 1492.0 | 1500.0 | 1507.3 | 1514.9 | 1522.1 | 1538.9 | 1553.6 |
|          | -63.8*         | -41.6* | 20.0   | 49.5   | 66.2   | 91.3   | 109.7  | 126.0  | 139.2  | 150.7  | 161.2  | 170.1  | 186.7  | 193.2  |
|          | 115.2          | 125.8  | 132.9  | 138.5  | 143.5  | 151.8  | 159.2  | 165.7  | 171.6  | 176.8  | 181.9  | 187.8  | 202.3  | 217.1  |
|          | 124.8          | 132.7  | 141.5  | 150.2  | 158.4  | 173.4  | 187.3  | 199.6  | 211.4  | 221.8  | 231.9  | 241.1  | 263.0  | 276.6  |
|          | 253.8          | 260.3  | 266.8  | 273.5  | 279.8  | 292.3  | 304.9  | 316.3  | 327.2  | 337.0  | 346.6  | 355.5  | 375.4  | 388.4  |
|          | 686.8          | 688.4  | 689.8  | 691.2  | 692.6  | 695.3  | 697.9  | 700.6  | 703.2  | 705.7  | 708.4  | 710.8  | 717.2  | 721.8  |
|          | 1374.7         | 1379.5 | 1384.1 | 1388.1 | 1392.2 | 1400.5 | 1407.9 | 1415.8 | 1422.6 | 1429.9 | 1436.7 | 1443.3 | 1458.2 | 1471.6 |

## References

1. Carteret C, De la Pierre M, Dossot M, Pascale F, Erba A, Dovesi R. The vibrational spectrum of  $\text{CaCO}_3$  aragonite: A combined experimental and quantum-mechanical investigation. *Journal of Chemical Physics* **138**, 014201 (2013).
2. Ulian G, Valdrè G. Structural and elastic behaviour of calcium carbonate ( $\text{CaCO}_3$ , space group *Pmcn*, aragonite) at high-pressure: a contribution from first-principle simulations. *Computational Materials Science* **212**, 111600 (2022).
3. Caspi EN, Pokroy B, Lee PL, Quintana JP, Zolotoyabko E. On the structure of aragonite. *Acta Crystallogr Sect B Struct Sci* **61**, 129-132 (2005).
4. Ungureanu CG, Prencipe M, Cossio R. Ab initio quantum-mechanical calculation of  $\text{CaCO}_3$  aragonite at high pressure: thermodynamic properties and comparison with experimental data. *Eur J Mineral* **22**, 693-701 (2010).
